# Supplementary material for: Borrowing from Peter to pay Paul: managing threatened predators of endangered and declining prey species
Source: PeerJ. 2019 Oct 15;7:e7916. doi: 10.7717/peerj.7916 (PMC6798864; doi:10.7717/peerj.7916)
Supplement: Table S3 — Raw data comprises a tabulation of all faecal sample analysis for lion and hyena scat collected in the study [file peerj-07-7916-s003.xlsx]

## Sheet: HYENA FULL
DATE	AREA NAME	37 N	UTM	SAMPLE	PZ	GZ	WTH	BUF	IMP	KUD	GRF	ORX	DK	WB	ELD	GG	CTL	SHP	GOT	TOTAL
2014-08-09	N/A	333270	27937	1	9	0	0	0	10	0	0	0	0	1	0	0	0	0	0	20
2014-08-15	N/A	322793	22669	2	2	0	4	0	11	0	0	3	0	0	0	0	0	0	0	20
2014-08-16	N/A	329952	26849	3	12	0	0	0	3	0	3	2	0	0	0	0	0	0	0	20
2014-08-20	N/A	322811	26259	4	7	0	2	0	10	0	1	0	0	0	0	0	0	0	0	20
2014-08-22	N/A	326058	18164	5	8	0	0	0	11	0	1	0	0	0	0	0	0	0	0	20
2014-08-23	N/A	327134	31153	6	2	2	0	0	1	0	8	0	0	7	0	0	0	0	0	20
2014-09-04	N/A	328845	30264	7	9	2	0	0	8	0	1	0	0	0	0	0	0	0	0	20
2014-09-04	N/A	318890	24993	8	7	0	3	0	7	0	0	3	0	0	0	0	0	0	0	20
2014-09-05	N/A	322341	25951	9	12	0	0	0	8	0	0	0	0	0	0	0	0	0	0	20
2014-09-05	N/A	322341	25951	10	8	0	5	0	1	0	0	4	0	2	0	0	0	0	0	20
2014-09-07	N/A	326378	31345	11	6	1	1	0	8	0	4	0	0	0	0	0	0	0	0	20
2014-09-14	N/A	331742	23560	12	5	0	0	0	15	0	0	0	0	0	0	0	0	0	0	20
2014-09-14	N/A	331742	23560	13	3	0	0	0	15	0	0	2	0	0	0	0	0	0	0	20
2014-09-17	N/A	319785	22964	14	2	0	0	0	15	0	2	0	0	1	0	0	0	0	0	20
2014-09-19	N/A	326028	18092	15	10	0	0	0	2	0	4	0	0	4	0	0	0	0	0	20
2014-09-21	N/A	331742	23560	16	8	2	0	0	10	0	0	0	0	0	0	0	0	0	0	20
2014-09-22	N/A	320328	23732	17	11	0	1	0	7	0	0	0	0	1	0	0	0	0	0	20
2014-09-29	N/A	327458	29619	18	4	0	0	0	4	0	11	0	0	0	1	0	0	0	0	20
30/09/2014	N/A	328444	20215	19	6	0	1	0	2	0	3	0	0	4	4	0	0	0	0	20
2015-06-30	N/A	N/A	N/A	20	2	1	0	1	16	0	0	0	0	0	0	0	0	0	0	20
2015-07-01	N/A	N/A	N/A	21	1	0	0	19	0	0	0	0	0	0	0	0	0	0	0	20
2015-07-02	N/A	N/A	N/A	22	0	4	0	13	3	0	0	0	0	0	0	0	0	0	0	20
2015-07-03	N/A	N/A	N/A	23	1	7	0	4	6	0	2	0	0	0	0	0	0	0	0	20
2015-07-04	N/A	N/A	N/A	24	1	6	0	5	4	0	4	0	0	0	0	0	0	0	0	20
2015-07-05	N/A	N/A	N/A	25	11	6	0	0	2	0	1	0	0	0	0	0	0	0	0	20
2015-07-06	N/A	N/A	N/A	26	13	1	0	0	0	0	6	0	0	0	0	0	0	0	0	20
2015-07-07	N/A	N/A	N/A	27	14	4	0	0	2	0	0	0	0	0	0	0	0	0	0	20
2015-09-30	N/A	N/A	N/A	28	10	0	0	0	10	0	0	0	0	0	0	0	0	0	0	20
2015-09-30	N/A	N/A	N/A	29	2	0	0	0	18	0	0	0	0	0	0	0	0	0	0	20
2015-09-30	N/A	N/A	N/A	30	19	1	0	0	0	0	0	0	0	0	0	0	0	0	0	20
2015-09-30	N/A	N/A	N/A	31	10	6	0	0	4	0	0	0	0	0	0	0	0	0	0	20
2015-09-30	N/A	N/A	N/A	32	5	1	0	11	1	0	2	0	0	0	0	0	0	0	0	20
2015-09-30	N/A	N/A	N/A	33	14	4	0	1	0	0	1	0	0	0	0	0	0	0	0	20
2015-09-30	N/A	N/A	N/A	34	9	0	0	1	10	0	0	0	0	0	0	0	0	0	0	20
2015-09-30	N/A	N/A	N/A	35	14	6	0	0	0	0	0	0	0	0	0	0	0	0	0	20
2015-09-30	N/A	N/A	N/A	36	20	0	0	0	0	0	0	0	0	0	0	0	0	0	0	20
2015-09-30	N/A	N/A	N/A	37	4	6	0	0	7	0	3	0	0	0	0	0	0	0	0	20
2015-09-30	N/A	N/A	N/A	38	10	4	0	0	6	0	0	0	0	0	0	0	0	0	0	20
2015-09-30	N/A	N/A	N/A	39	4	0	0	12	3	0	1	0	0	0	0	0	0	0	0	20
2015-09-30	N/A	N/A	N/A	40	7	0	0	6	6	0	1	0	0	0	0	0	0	0	0	20
2015-09-30	N/A	N/A	N/A	41	18	0	0	1	0	0	1	0	0	0	0	0	0	0	0	20
2015-10-07	DAM YA MAMA	332253	23369	42	0	0	0	0	20	0	0	0	0	0	0	0	0	0	0	20
2015-10-11	FOREST	325433	18537	43	6	0	0	0	12	0	1	0	0	0	1	0	0	0	0	20
2015-11-09	MILIMA NUGU	331925	27630	44	3	0	0	0	12	0	5	0	0	0	0	0	0	0	0	20
2015-11-20	PARKING YA WILLY	324893	23117	45	5	4	0	0	8	0	1	0	0	0	2	0	0	0	0	20
2015-12-01	MATEKENYA	326463	24808	46	3	2	0	0	10	0	1	0	0	1	3	0	0	0	0	20
2015-12-09	DARAJA YA IAN	329072	24049	47	4	3	0	5	6	0	0	0	0	0	2	0	0	0	0	20
2015-12-14	CORNER YA MANYANGALLO	324618	19372	48	5	0	0	6	2	0	5	0	0	1	1	0	0	0	0	20
2016-01-08	Dam kubwa	322336	26007	49	1	1	0	4	4	0	3	0	0	1	3	0	0	3	0	20
2016-02-09	Head quarters	328351	21513	50	8	2	0	1	4	0	0	0	0	2	0	0	1	2	0	20
2016-02-10	Kangauro	322237	26169	51	7	3	0	2	8	0	0	0	0	0	0	0	0	0	0	20
2016-02-12	Dam kubwa	322841	26955	52	1	2	0	6	5	0	3	0	0	0	1	0	1	1	0	20
2016-02-25	CHARLIE DEN	319702	19979	53	8	4	0	2	4	0	0	0	0	2	0	0	0	0	0	20
2016-02-25	CHARLIE DEN	319702	19979	54	8	5	0	0	1	0	3	0	0	0	1	0	0	2	0	20
2016-02-28	NDERI DEN	334360	28730	55	3	0	0	0	13	0	1	0	0	0	0	0	3	0	0	20
2016-02-28	NDERI DEN	334360	28730	56	1	3	0	0	12	0	2	0	0	0	2	0	0	0	0	20
2016-02-28	NDERI DEN	334360	28730	57	3	2	0	1	3	0	6	0	0	0	1	0	3	1	0	20
2016-02-28	NDERI DEN	334360	28730	58	0	0	0	1	10	0	0	0	0	0	0	0	5	3	1	20
2016-02-28	NDERI DEN	334360	28730	59	2	3	0	0	7	0	0	0	0	1	0	0	7	0	0	20
2016-02-28	NDERI DEN	334360	28730	60	0	0	0	0	9	0	5	0	0	0	1	0	0	0	5	20
2016-02-28	NDERI DEN	334360	28730	61	7	0	0	1	2	0	0	0	0	0	0	0	7	3	0	20
2016-02-28	NDERI DEN	334360	28730	62	1	1	0	0	14	0	0	0	0	1	0	0	1	0	2	20
2016-02-28	NDERI DEN	334360	28730	63	1	1	0	1	10	0	1	0	0	0	0	0	5	1	0	20
2016-02-28	NDERI DEN	334360	28730	64	5	2	0	1	0	0	2	0	0	2	0	0	3	4	1	20
2016-02-28	NDERI DEN	334360	28730	65	0	2	0	0	17	0	0	0	0	1	0	0	0	0	0	20
2016-02-28	NDERI DEN	334360	28730	66	1	5	0	2	7	0	1	0	0	0	1	0	0	0	3	20
2016-02-28	NDERI DEN	334360	28730	67	4	0	0	0	15	0	0	0	0	0	0	0	0	0	1	20
2016-02-28	NDERI DEN	334360	28730	68	5	2	0	1	4	0	2	0	0	0	2	0	1	3	0	20
2016-02-28	NDERI DEN	334360	28730	69	1	1	0	4	8	0	3	0	0	1	0	0	1	1	0	20
2016-02-29	CHARLIE DEN	319702	19979	70	6	6	0	0	3	0	1	0	0	0	1	0	2	0	1	20
2016-02-29	CHARLIE DEN	319702	19979	71	2	5	0	0	7	0	4	0	0	2	0	0	0	0	0	20
2016-02-29	CHARLIE DEN	319702	19979	72	8	4	0	0	1	0	1	0	0	0	0	0	5	1	0	20
2016-02-29	CHARLIE DEN	319702	19979	73	8	7	0	0	0	0	3	0	0	0	2	0	0	0	0	20
2016-02-29	CHARLIE DEN	319702	19979	74	6	1	0	0	4	0	0	0	0	1	0	0	0	0	8	20
2016-02-29	CHARLIE DEN	319702	19979	75	8	6	1	0	1	0	1	2	0	0	0	0	0	1	0	20
2016-02-29	CHARLIE DEN	319702	19979	76	10	1	0	0	1	0	2	1	0	3	0	0	0	2	0	20
2016-02-29	CHARLIE DEN	319702	19979	77	3	2	0	6	3	0	0	0	0	0	6	0	0	0	0	20
2016-02-29	CHARLIE DEN	319702	19979	78	7	5	0	0	0	0	2	0	0	0	0	0	0	6	0	20
2016-03-02	TWIGA DEN	324990	17471	79	3	2	0	7	0	0	0	0	0	0	8	0	0	0	0	20
2016-03-07	Laga ya fisi	328444	20215	80	4	0	0	0	6	0	0	0	0	2	2	0	5	1	0	20
2016-03-08	Sirikoi plain	324128	26854	81	7	1	0	2	1	0	1	0	0	3	3	0	0	2	0	20
2016-03-16	CHARLIE DEN	319702	19979	82	2	5	0	0	1	0	0	2	0	1	2	0	1	6	0	20
2016-03-18	LUAI YA SHAMBA	320180	24900	83	13	4	0	1	0	0	0	0	0	2	0	0	0	0	0	20
2016-03-18	N/A	331113	20163	84	9	7	0	0	4	0	0	0	0	0	0	0	0	0	0	20
2016-03-18	N/A	317206	24915	85	4	3	0	1	1	0	2	0	0	3	5	0	1	0	0	20
2016-03-18	LAGA MWINGI	327326	19592	86	2	1	0	7	0	0	0	0	0	6	0	0	4	0	0	20
2016-03-21	N/A	325635	22584	87	5	0	0	2	2	0	2	1	0	1	7	0	0	0	0	20
2016-03-24	SHAMBA DEN	320151	24738	88	7	5	0	0	0	0	3	2	0	2	0	0	1	0	0	20
2016-03-24	SHAMBA DEN	320151	24738	89	0	0	0	8	3	0	0	0	0	3	0	0	0	6	0	20
2016-03-24	SHAMBA DEN	320151	24738	90	4	0	0	0	5	0	0	0	0	6	0	0	0	2	3	20
2016-03-24	SHAMBA DEN	320151	24738	91	5	6	0	0	1	0	0	0	0	2	2	0	1	2	1	20
2016-03-24	SHAMBA DEN	320151	24738	92	3	3	0	3	3	0	2	0	0	1	2	0	1	1	1	20
2016-04-01	N/A	323371	27521	93	4	0	0	1	1	0	3	2	0	2	3	0	2	2	0	20
2016-04-01	N/A	312472	25937	94	1	0	0	1	3	0	0	1	0	5	3	0	1	2	3	20
2016-04-01	N/A	317687	25187	95	6	4	0	0	8	0	0	0	0	0	0	0	0	0	2	20
2016-04-02	UTALII DEN	331510	29642	96	6	1	0	0	5	0	2	1	0	3	2	0	0	0	0	20
2016-04-02	CHARLIE DEN	319702	19979	97	3	1	0	2	4	0	0	0	0	4	0	0	1	3	2	20
2016-04-02	UTALII DEN	331510	29642	98	6	3	0	0	1	0	0	0	0	1	0	0	6	1	2	20
2016-04-02	UTALII DEN	331510	29642	99	3	3	0	0	2	0	0	0	0	0	0	0	0	12	0	20
2016-04-02	UTALII DEN	331510	29642	100	9	2	0	2	2	0	0	0	0	0	1	0	0	0	4	20
2016-04-02	UTALII DEN	331510	29642	101	4	2	0	1	2	0	0	0	0	4	1	0	2	0	4	20
2016-04-02	UTALII DEN	331510	29642	102	2	0	0	3	3	0	0	0	0	4	2	0	1	2	3	20
2016-04-02	UTALII DEN	331510	29642	103	3	0	0	1	8	0	0	0	0	1	2	0	2	0	3	20
2016-04-02	UTALII DEN	331510	29642	104	1	0	0	1	1	0	0	0	0	4	4	0	6	1	2	20
2016-04-02	UTALII DEN	331510	29642	105	4	1	0	3	3	0	0	0	0	0	1	0	1	6	1	20
2016-04-02	UTALII DEN	331510	29642	106	0	5	0	0	0	0	2	0	0	0	0	0	3	10	0	20
2016-04-07	CHARLIE DEN	319702	19979	107	7	0	0	2	5	0	0	0	0	0	0	0	0	4	2	20
2016-04-07	CHARLIE DEN	319702	19979	108	4	2	0	5	6	0	0	0	0	0	0	0	2	1	0	20
2016-04-07	N/A	330894	28073	109	3	2	0	0	1	0	1	0	0	0	0	0	0	6	7	20
2016-04-08	SHAMBA DEN	320151	24738	110	0	0	0	13	0	0	0	0	0	0	1	0	1	5	0	20
2016-04-08	N/A	312770	27242	111	2	1	0	11	0	0	0	0	0	1	0	0	1	4	0	20
2016-04-08	N/A	312770	27242	112	4	1	0	5	4	0	1	0	0	0	1	0	0	4	0	20
2016-04-08	N/A	312770	27242	113	3	2	0	1	1	0	0	0	0	7	0	0	2	2	2	20
2016-04-08	N/A	312770	27242	114	3	2	0	2	1	0	1	0	0	0	4	0	1	4	2	20
2016-04-09	Morani	323974	30164	115	3	4	0	2	2	0	2	0	0	5	2	0	0	0	0	20
2016-04-10	Sirkoi	324884	23553	116	9	4	0	2	2	0	0	0	0	0	0	0	1	2	0	20
2016-04-11	Digbys	331983	25445	117	4	3	0	0	1	0	0	3	0	1	3	0	4	0	1	20
2016-04-12	N/A	320514	28977	118	5	1	0	0	0	0	0	0	0	0	1	0	2	10	1	20
2016-04-12	N/A	327258	26487	119	2	0	0	1	0	0	0	0	0	1	0	0	1	9	6	20
2016-04-13	N/A	324442	25469	120	7	5	0	1	4	0	0	0	0	1	1	0	0	1	0	20
2016-04-13	SHAMBA DEN	320151	24738	121	4	0	0	1	5	0	7	0	0	0	0	0	0	3	0	20
2016-04-20	LAGA DEN	321370	19358	122	7	1	0	1	1	0	0	0	0	1	0	0	1	4	4	20
2016-05-07	milima simba	328721	29111	123	4	9	0	0	6	0	0	0	0	0	0	0	0	1	0	20
2016-05-08	Lewa house	329952	26849	124	7	6	0	0	6	0	0	0	0	0	1	0	0	0	0	20
2016-06-12	Ngare niting	326163	17469	125	4	0	0	1	5	0	10	0	0	0	0	0	0	0	0	20
2016-07-07	Laga ya fisi	328421	20187	126	2	0	0	2	0	0	7	0	0	1	4	0	0	4	0	20
2016-07-08	Sobuiga	326359	18564	127	4	0	0	0	7	0	0	0	0	2	1	0	3	3	0	20
13/07/2016	Morial	327910	28379	128	4	0	0	0	4	0	0	0	0	3	8	0	0	1	0	20
16/07/2016	Ngurunga	330624	25835	129	1	4	0	0	4	0	5	0	0	2	3	0	0	1	0	20
18/07/2016	Milima nugu	331106	27704	130	7	0	0	1	2	0	1	0	0	4	1	0	3	1	0	20
22/07/2016	mlima	331472	29620	131	1	7	0	0	0	0	3	0	0	3	2	0	3	1	0	20
24/07/2016	Milima kangaroo	323672	26161	132	0	2	0	1	3	0	5	0	0	2	5	0	1	1	0	20
26/07/2016	Annas house	324809	27797	133	10	3	0	0	3	0	0	0	0	2	0	0	0	2	0	20
30/07/2016	Dam ya Charlie	325584	19678	134	0	2	0	6	2	0	2	0	0	2	4	0	1	1	0	20
2016-08-07	Matunda	331497	19919	135	3	0	0	5	3	0	1	0	0	0	1	0	4	3	0	20
13/08/2016	Shangarawe	329060	21712	136	11	5	0	0	2	0	0	0	0	1	0	0	1	0	0	20
15/08/2016	Mtego ya twiga	326135	19599	137	6	6	0	0	1	0	2	0	0	0	3	0	1	1	0	20
17/08/2016	Fumbi	326960	30988	138	5	1	0	1	1	0	0	0	0	2	4	0	6	0	0	20
20/08/2016	Leparua	327134	31530	139	2	4	0	0	2	0	8	0	0	1	2	0	0	1	0	20
23/08/2016	Sobuiga	328336	19407	140	4	7	0	1	2	0	0	0	0	2	1	0	1	2	0	20
2016-09-11	Digbys	329851	24721	141	3	0	0	1	4	0	2	1	0	1	2	0	2	3	1	20
19/09/2016	Wilderness	332487	26792	142	1	2	0	2	1	0	4	0	0	1	2	0	5	2	0	20
20/09/2016	Sambara	329222	30354	143	1	0	0	16	0	0	0	0	0	0	1	0	2	0	0	20
23/09/2016	Bom campsite	327169	22512	144	8	1	0	6	3	0	2	0	0	0	0	0	0	0	0	20
26/09/2016	Digbys	329073	24071	145	0	0	0	0	1	0	4	0	0	2	3	0	2	8	0	20
2016-10-09	Mnanda ya Charlie	328428	18317	146	5	4	0	0	4	0	2	0	0	1	2	0	2	0	0	20
2016-10-11	Njoora	321194	19514	147	4	2	0	3	0	0	10	0	0	0	1	0	0	0	0	20
17/10/2016	Milima nugu	332118	28231	148	5	2	0	0	2	0	1	1	0	1	1	0	7	0	0	20
2016-11-09	Dam ya mama	331156	23486	149	0	1	0	2	4	0	2	0	0	1	5	0	4	1	0	20
2016-11-12	Annas house	323086	27195	150	4	3	0	11	0	0	2	0	0	0	0	0	0	0	0	20
15/11/2016	Borana	316491	23072	151	7	8	0	0	3	0	0	0	0	0	0	0	1	0	1	20
17/11/2016	Irmwaateni	320818	19293	152	6	2	0	4	3	0	0	1	0	0	0	0	1	2	1	20
20/11/2016	Milima ngware	322191	29115	153	4	5	0	1	5	0	1	1	0	0	2	0	1	0	0	20
2016-12-07	Isiolo valley	331055	29517	154	0	0	0	0	3	0	15	0	0	0	0	0	2	0	0	20
2016-12-08	Allan root	323715	21749	155	12	2	0	0	1	0	0	0	0	2	0	0	3	0	0	20
2016-12-10	Mikes place	329017	22938	156	2	0	0	0	3	0	0	0	0	6	0	0	1	5	3	20
2016-12-10	Isiolo valley	330096	27353	157	3	0	0	3	0	0	1	0	0	4	2	0	2	2	3	20
2016-12-11	Ngare niting	326309	17723	158	1	0	0	1	6	0	0	1	0	1	1	0	5	3	1	20
13/12/2016	Milima kangauro	323212	26438	159	4	2	0	2	6	0	0	0	0	0	0	0	3	2	1	20
17/12/2016	Mardadi	328327	21652	160	1	1	0	2	4	0	3	0	0	3	1	0	2	2	1	20
18/12/2016	Soboiga	327730	20447	161	6	1	0	2	3	0	1	2	0	3	2	0	0	0	0	20
N/A	N/A	N/A	N/A	162	3	2	3	0	6	0	4	0	0	2	0	0	0	0	0	20
N/A	N/A	N/A	N/A	163	9	3	0	0	4	0	1	0	0	1	2	0	0	0	0	20
N/A	N/A	N/A	N/A	164	14	0	0	1	5	0	0	0	0	0	0	0	0	0	0	20
N/A	N/A	N/A	N/A	165	5	2	2	2	4	0	2	0	0	1	2	0	0	0	0	20
N/A	N/A	N/A	N/A	166	7	2	0	1	7	0	2	0	0	0	1	0	0	0	0	20
					848	337	23	289	731	0	251	36	0	173	168	0	169	205	90	3320

## Sheet: LION FULL
DATE	AREA NAME	37 N	UTM	SAMPLE	PZ	GZ	WTH	BUF	IMP	KUD	GRF	ORX	DK	WB	ELD	GG	CTL	SHP	GOT	TOTAL
2014-04-03	N/A	330746	22502	1	12	0	0	0	0	0	0	0	0	0	8	0	0	0	0	20
2014-04-05	N/A	330729	24363	2	0	0	20	0	0	0	0	0	0	0	0	0	0	0	0	20
2014-04-08	N/A	330427	23952	3	17	0	0	0	0	0	0	0	0	0	3	0	0	0	0	20
2014-04-10	N/A	327978	21799	4	3	2	15	0	0	0	0	0	0	0	0	0	0	0	0	20
2014-04-14	N/A	321212	30198	5	0	0	1	19	0	0	0	0	0	0	0	0	0	0	0	20
2014-04-14	N/A	331188	27231	6	2	6	0	3	0	0	2	0	0	0	7	0	0	0	0	20
2014-04-21	N/A	322591	27022	7	12	8	0	0	0	0	0	0	0	0	0	0	0	0	0	20
2014-04-21	N/A	322584	26971	8	9	3	0	0	4	0	0	0	0	0	4	0	0	0	0	20
2014-04-21	N/A	326893	25066	9	4	2	1	1	0	1	0	0	0	0	11	0	0	0	0	20
2014-04-24	N/A	323164	26397	10	5	10	1	0	0	0	1	0	0	0	3	0	0	0	0	20
2014-04-24	N/A	319216	27904	11	0	1	0	2	1	0	0	0	0	0	16	0	0	0	0	20
2014-04-25	N/A	325203	19235	12	2	9	0	0	0	0	3	0	0	0	6	0	0	0	0	20
2014-04-28	N/A	324891	26294	13	13	0	0	2	0	0	0	0	0	0	5	0	0	0	0	20
2014-05-02	N/A	325618	29493	14	0	0	0	0	0	0	15	0	0	0	5	0	0	0	0	20
2014-05-03	N/A	325693	28262	15	2	2	1	1	0	0	1	0	0	0	13	0	0	0	0	20
2014-05-05	N/A	325173	31587	16	2	11	0	0	0	1	1	0	0	0	5	0	0	0	0	20
2014-05-05	N/A	326815	31039	17	3	2	4	1	0	0	5	0	0	0	5	0	0	0	0	20
2014-05-10	N/A	327180	20073	18	0	1	0	0	0	0	3	0	0	0	16	0	0	0	0	20
2014-05-13	N/A	325282	18938	19	0	2	0	0	0	0	2	0	0	0	16	0	0	0	0	20
2014-05-17	N/A	325067	31706	20	0	0	2	6	0	0	2	0	0	0	10	0	0	0	0	20
2014-05-17	N/A	324662	28773	21	0	1	2	0	0	0	11	0	0	0	6	0	0	0	0	20
2014-05-19	N/A	322869	20850	22	0	0	0	4	0	0	2	0	0	0	14	0	0	0	0	20
2014-05-21	N/A	330724	25111	23	1	1	7	0	0	0	10	0	0	0	1	0	0	0	0	20
2014-05-22	N/A	321757	25205	24	0	0	15	0	0	4	0	0	0	0	1	0	0	0	0	20
2014-05-22	N/A	323063	29748	25	0	0	0	0	0	0	0	13	0	0	7	0	0	0	0	20
2014-10-02	N/A	329070	24047	26	5	8	0	0	0	0	7	0	0	0	0	0	0	0	0	20
2014-10-04	N/A	322831	28749	27	18	0	0	0	0	0	2	0	0	0	0	0	0	0	0	20
2014-10-06	N/A	321909	29818	28	4	1	0	0	15	0	0	0	0	0	0	0	0	0	0	20
2014-10-07	N/A	329661	25627	29	8	4	3	0	5	0	0	0	0	0	0	0	0	0	0	20
2014-10-22	N/A	327423	23247	30	1	0	0	0	1	0	17	0	0	0	1	0	0	0	0	20
2014-11-06	N/A	326700	23200	31	4	5	2	0	5	0	0	0	0	0	4	0	0	0	0	20
2014-11-08	N/A	323135	25847	32	4	2	4	0	3	0	2	0	0	4	1	0	0	0	0	20
2014-11-12	N/A	324893	26319	33	1	12	0	0	0	0	2	0	0	4	1	0	0	0	0	20
2014-11-17	N/A	329155	22548	34	0	1	0	0	16	0	0	0	0	3	0	0	0	0	0	20
2014-11-20	N/A	328673	22091	35	11	1	0	0	5	0	0	0	0	3	0	0	0	0	0	20
2015-04-01	N/A	329072	24049	36	9	7	0	4	0	0	0	0	0	0	0	0	0	0	0	20
2015-04-03	N/A	330270	22105	37	8	3	0	2	2	0	0	0	0	0	5	0	0	0	0	20
2015-04-06	N/A	325692	23727	38	0	1	0	0	19	0	0	0	0	0	0	0	0	0	0	20
2015-04-14	N/A	326463	24808	39	15	3	0	0	2	0	0	0	0	0	0	0	0	0	0	20
2015-04-17	N/A	314858	31335	40	5	2	0	0	12	0	0	0	0	0	1	0	0	0	0	20
2015-05-08	N/A	304512	27022	41	6	3	0	6	5	0	0	0	0	0	0	0	0	0	0	20
2015-05-09	N/A	309693	23869	42	5	4	0	5	6	0	0	0	0	0	0	0	0	0	0	20
2015-05-14	N/A	303537	25678	43	6	3	0	0	10	0	0	0	0	0	1	0	0	0	0	20
2015-06-02	N/A	333308	27453	44	7	4	0	0	9	0	0	0	0	0	0	0	0	0	0	20
2015-06-05	N/A	325619	19119	45	8	4	0	2	0	0	0	0	0	0	6	0	0	0	0	20
2015-06-16	N/A	325979	17560	46	5	1	0	1	3	0	0	0	0	0	10	0	0	0	0	20
2015-06-19	N/A	329851	26898	47	5	2	0	1	1	0	1	0	0	0	10	0	0	0	0	20
2015-07-02	N/A	324632	17983	48	16	0	0	0	0	0	4	0	0	0	0	0	0	0	0	20
2015-07-04	N/A	329794	24089	49	20	0	0	0	0	0	0	0	0	0	0	0	0	0	0	20
2015-07-05	N/A	305506	24347	50	12	0	0	0	8	0	0	0	0	0	0	0	0	0	0	20
2015-07-06	N/A	325138	19465	51	0	20	0	0	0	0	0	0	0	0	0	0	0	0	0	20
2015-07-08	N/A	329138	22145	52	9	4	0	0	7	0	0	0	0	0	0	0	0	0	0	20
2015-07-09	N/A	316408	27058	53	2	0	0	0	18	0	0	0	0	0	0	0	0	0	0	20
2015-07-09	N/A	306596	23957	54	18	0	0	0	2	0	0	0	0	0	0	0	0	0	0	20
2015-07-13	N/A	311835	26487	55	19	1	0	0	0	0	0	0	0	0	0	0	0	0	0	20
2015-07-19	N/A	308205	23441	56	16	0	0	0	1	0	0	0	0	0	3	0	0	0	0	20
2015-08-05	N/A	332905	26200	57	17	3	0	0	0	0	0	0	0	0	0	0	0	0	0	20
2015-08-07	N/A	332904	26200	58	10	5	0	0	1	0	0	0	0	0	4	0	0	0	0	20
2015-08-11	N/A	332906	26201	59	5	3	0	0	0	0	0	0	0	0	12	0	0	0	0	20
2015-08-16	N/A	313592	24667	60	12	0	0	6	0	0	1	1	0	0	0	0	0	0	0	20
2015-08-26	N/A	324415	22413	61	1	0	0	0	19	0	0	0	0	0	0	0	0	0	0	20
2015-10-02	Bosnia	325813	21370	62	0	0	0	20	0	0	0	0	0	0	0	0	0	0	0	20
2015-10-04	Bosnia	326454	21157	63	9	1	1	0	4	0	1	0	0	1	3	0	0	0	0	20
2015-10-19	Milima njora	322878	20845	64	7	2	2	0	0	0	5	0	0	2	2	0	0	0	0	20
2015-11-10	Milima loishimi	321237	24906	65	7	1	4	0	0	0	2	3	0	0	3	0	0	0	0	20
2015-11-12	Headquarter	328035	22707	66	10	3	0	0	2	0	1	0	0	0	4	0	0	0	0	20
2015-11-16	Mtego ya toiga	326803	19258	67	12	1	1	0	1	0	0	0	0	0	5	0	0	0	0	20
2015-12-03	Forest	321583	18884	68	8	1	0	4	0	0	1	0	0	0	6	0	0	0	0	20
2015-12-06	Wilderness	333362	26012	69	13	4	0	0	0	0	0	0	0	0	3	0	0	0	0	20
2016-01-04	N/A	315562	27954	70	3	6	3	0	6	0	2	0	0	0	0	0	0	0	0	20
2016-01-04	Swamp	328218	23508	71	13	0	0	7	0	0	0	0	0	0	0	0	0	0	0	20
2016-01-04	N/A	312359	24213	72	5	0	0	8	1	0	0	0	0	0	6	0	0	0	0	20
2016-01-06	Ngurunga	331257	26241	73	2	3	0	0	12	0	0	1	0	0	2	0	0	0	0	20
2016-02-02	Forest	323075	18928	74	19	0	0	0	0	0	0	0	0	0	1	0	0	0	0	20
2016-02-07	Annas house	323055	27974	75	9	0	0	5	0	0	3	0	0	0	3	0	0	0	0	20
2016-02-10	Tim hill	329910	27837	76	7	7	0	5	0	0	1	0	0	0	0	0	0	0	0	20
2016-02-11	Sirkoi	324128	26854	77	6	6	0	2	0	0	6	0	0	0	0	0	0	0	0	20
2016-02-23	Alan Root	323715	21749	78	6	2	1	0	9	0	2	0	0	0	0	0	0	0	0	20
2016-02-27	Simba Ridge	330033	23022	79	6	0	0	0	3	0	10	0	0	0	1	0	0	0	0	20
2016-03-02	Headquarters	328212	21251	80	5	4	0	7	2	0	0	0	0	0	2	0	0	0	0	20
2016-03-04	Lewa House	330268	26704	81	0	5	0	0	1	0	0	10	0	0	4	0	0	0	0	20
2016-03-07	Luai ya Willy Robert	324538	23362	82	10	6	0	0	4	0	0	0	0	0	0	0	0	0	0	20
2016-03-08	Soboiga	327294	18073	83	11	2	0	0	0	0	2	0	0	1	4	0	0	0	0	20
2016-03-11	Fumbi	324542	32085	84	4	0	2	3	0	0	9	0	0	0	2	0	0	0	0	20
2016-03-16	Matekenya	327147	22662	85	9	11	0	0	0	0	0	0	0	0	0	0	0	0	0	20
2016-04-01	N/A	315562	27954	86	3	6	3	0	6	0	2	0	0	0	0	0	0	0	0	20
2016-04-01	N/A	328218	23508	87	13	0	0	7	0	0	0	0	0	0	0	0	0	0	0	20
2016-04-01	N/A	312359	24213	88	5	0	0	8	1	0	0	0	0	0	6	0	0	0	0	20
2016-04-06	Milima ngware	324117	31133	89	10	4	0	0	5	0	1	0	0	0	0	0	0	0	0	20
2016-04-07	Milima ngware	327448	28601	90	12	1	0	3	0	0	0	0	0	2	2	0	0	0	0	20
2016-04-08	Boma ya faru	325672	18164	91	5	0	0	1	0	0	8	0	0	2	4	0	0	0	0	20
2016-04-09	Sambara	332179	27744	92	8	2	0	0	0	0	2	0	0	2	5	0	1	0	0	20
2016-04-10	Ngurunga	330894	26082	93	8	0	1	6	0	0	2	0	0	2	1	0	0	0	0	20
2016-04-11	N/A	328666	22697	94	14	6	0	0	0	0	0	0	0	0	0	0	0	0	0	20
2016-04-12	N/A	330662	24920	95	11	6	0	0	0	0	0	0	0	0	3	0	0	0	0	20
2016-04-14	N/A	332875	26630	96	7	0	0	13	0	0	0	0	0	0	0	0	0	0	0	20
2016-04-19	N/A	312553	26636	97	11	5	0	4	0	0	0	0	0	0	0	0	0	0	0	20
2016-04-19	N/A	312553	26636	98	11	5	0	4	0	0	0	0	0	0	0	0	0	0	0	20
2016-04-22	N/A	326080	22794	99	1	0	0	0	0	2	14	0	0	0	3	0	0	0	0	20
2016-05-08	Annas house	323610	26047	100	6	0	0	4	0	0	3	0	0	3	4	0	0	0	0	20
2016-05-08	Milima Ian	328212	21251	101	6	2	0	2	0	0	3	0	0	2	4	0	1	0	0	20
2016-05-12	Morial camp	328154	27851	102	16	2	1	0	0	0	0	0	0	0	0	0	1	0	0	20
26/05/2016	Kangauro	324040	27664	103	0	0	0	20	0	0	0	0	0	0	0	0	0	0	0	20
28/05/2016	Shamba mrefu	324809	19185	104	16	4	0	0	0	0	0	0	0	0	0	0	0	0	0	20
29/05/2016	Milima kangauro	322047	24843	105	6	2	0	0	0	0	0	1	0	6	5	0	0	0	0	20
2016-06-09	Lewa house	330268	26704	106	6	4	0	1	0	0	4	0	0	5	0	0	0	0	0	20
2016-06-10	Njari	329950	24615	107	3	3	0	3	0	0	5	0	0	2	3	0	1	0	0	20
18/06/2016	Narasha	324021	27743	108	0	0	0	0	0	0	10	0	0	0	10	0	0	0	0	20
2016-07-06	Boma inne	322240	26161	109	17	3	0	0	0	0	0	0	0	0	0	0	0	0	0	20
2016-07-06	Fumbi plain	324117	31133	110	4	2	0	5	0	0	5	2	0	0	2	0	0	0	0	20
2016-07-07	Milima tiim	328312	23587	111	5	2	0	3	0	0	4	0	0	0	6	0	0	0	0	20
2016-07-07	Milima Belinda	324399	26288	112	7	2	0	2	0	0	6	0	0	0	3	0	0	0	0	20
2016-07-11	Fumbi	324484	32390	113	13	5	0	0	0	0	0	1	0	0	1	0	0	0	0	20
14/07/2016	Fumbi	326378	31345	114	3	0	0	0	0	0	11	0	0	2	3	0	1	0	0	20
16/07/2016	Swamp	328552	22957	115	19	0	0	0	0	0	0	0	0	0	1	0	0	0	0	20
2016-08-07	Fumbi	324146	30409	116	15	0	0	1	0	0	2	0	0	1	1	0	0	0	0	20
2016-08-07	Marura	324198	28044	117	8	2	0	4	0	0	0	0	0	2	4	0	0	0	0	20
2016-08-12	Milima simba	328281	28730	118	3	0	0	8	0	0	0	1	0	4	4	0	0	0	0	20
17/08/2016	Kisima ndogo	326618	31248	119	7	1	0	3	0	0	5	0	0	2	1	0	1	0	0	20
2016-09-06	Anna's house	323496	26938	120	0	20	0	0	0	0	0	0	0	0	0	0	0	0	0	20
2016-09-09	Milima matunda	332463	23620	121	4	2	0	4	0	0	4	0	0	2	3	0	1	0	0	20
2016-09-10	Boma ya faru	327182	19878	122	4	0	0	5	0	0	4	1	0	3	3	0	0	0	0	20
15/09/2016	Milima Ian	329441	23962	123	6	4	0	2	0	0	5	0	0	0	3	0	0	0	0	20
18/09/2016	Ngurunga	331803	25849	124	2	0	0	4	0	0	8	0	0	1	4	0	1	0	0	20
21/09/2016	Boma inne	320303	29102	125	0	3	0	7	0	0	4	0	0	2	4	0	0	0	0	20
2016-10-06	Borana	316812	27024	126	19	0	0	0	0	0	0	0	0	0	1	0	0	0	0	20
2016-10-08	Safari camp	321234	29475	127	4	3	0	5	0	0	1	0	0	2	2	0	3	0	0	20
13/10/2016	Milima choroa	331682	26197	128	9	7	0	0	0	0	0	1	0	0	2	0	1	0	0	20
2016-11-07	Kangauro	323775	26134	129	8	0	0	9	0	0	1	0	0	0	2	0	0	0	0	20
14/11/2016	Bosnia	326403	21521	130	3	0	1	12	0	0	2	0	0	0	1	0	1	0	0	20
17/11/2016	Kangauro	322265	26182	131	13	3	0	0	0	0	0	0	0	2	2	0	0	0	0	20
24/11/2016	Milima mwitia	324550	32082	132	3	1	0	0	0	0	16	0	0	0	0	0	0	0	0	20
2016-12-09	Karionga	325300	19432	133	6	0	0	4	0	0	4	0	0	2	4	0	0	0	0	20
2016-12-11	Corner safi	319821	24842	134	3	2	0	3	0	0	4	2	0	3	3	0	0	0	0	20
13/12/2016	Fumbi	326012	29283	135	10	7	0	1	0	0	0	0	0	2	0	0	0	0	0	20
19/12/2016	Makutikuti	328209	27188	136	7	2	0	5	0	0	3	1	0	1	1	0	0	0	0	20
21/12/2016	Sagana	327784	28668	137	6	5	0	4	0	0	3	0	0	0	2	0	0	0	0	20
23/12/2016	Ndadapoi	326459	30251	138	8	2	0	4	0	0	3	1	0	0	2	0	0	0	0	20
N/A	N/A	326080	22794	139	1	0	0	0	0	2	14	0	0	0	3	0	0	0	0	20
N/A	N/A	332005	23212	140	1	0	9	0	0	0	2	0	0	0	8	0	0	0	0	20
N/A	N/A	323806	30433	141	2	2	0	0	0	0	11	0	0	0	5	0	0	0	0	20
N/A	N/A	332074	23196	142	0	1	2	0	0	0	11	0	0	0	6	0	0	0	0	20
N/A	N/A	332005	23212	143	1	0	9	0	0	0	2	0	0	0	8	0	0	0	0	20
N/A	N/A	323806	30433	144	2	2	0	0	0	0	11	0	0	0	5	0	0	0	0	20

## Sheet: PROPORTIONS
SPECIES	HYENA	REL FRQY	SQUARED								LION	REL FRQY	SQUARED
PZ	154	0.16577	0.0274796								123	0.215035	0.04624
GZ	108	0.116254	0.013515								95	0.166084	0.0275839
WTH	11	0.0118407	0.000140202								28	0.048951	0.00239621
BUF	83	0.0893434	0.00798224								60	0.104895	0.011003
IMP	142	0.152853	0.0233639								40	0.0699301	0.00489021
KUD	0	0	0								5	0.00874126	7.64096e-05
GRF	86	0.0925727	0.0085697								71	0.124126	0.0154072
ORX	21	0.022605	0.000510984								14	0.0244755	0.000599051
WB	77	0.0828848	0.00686989								31	0.0541958	0.00293719
ELD	73	0.0785791	0.00617468								94	0.164336	0.0270062
CTL	68	0.073197	0.0053578								11	0.0192308	0.000369822
SHP	69	0.0742734	0.00551654								0	0	0
GOT	37	0.0398278	0.00158625								0	0	0
		1										1
H TOTAL	929									L TOTAL	572
H SUM	0.107067									L SUM	0.138509
LEVINS	9.33997									LEVINS	7.21974
STD LEVINS	0.641536									STD LEVINS	0.478441

## Sheet: ABBREVIATIONS
PZ	Plains zebra
GZ	Grevy's zebra
WTH	Warthog
BUF	Buffalo
IMP	Impala
KUD	Kudu
GRF	Giraffe
ORX	Oryx
DK	Dik dik
WB	Waterbuck
ELD	Eland
GG	Grant's gazelle
CTL	Cattle
SHP	Sheep
GOT	Goat
